# Supplementary material for: ‘Blue Carbon’ and Nutrient Stocks of Salt Marshes at a Temperate Coastal Lagoon (Ria de Aveiro, Portugal)
Source: PubMed Central journal article supplement (PMC5264181; doi:10.1038/srep41225), 2017-01-25
Supplement: srep41225-s1.pdf [file srep41225-s1.pdf]

**‘Blue Carbon’ and Nutrient Stocks of Salt Marshes at a Temperate Coastal Lagoon (Ria de Aveiro, Portugal)**

Ana I. Sousa<sup>1\*</sup>, Danielle B. Santos<sup>1,2</sup>, Eduardo Ferreira da Silva<sup>2</sup>, Lisa P. Sousa<sup>3</sup>, Daniel F.R. Cleary<sup>1</sup>, Amadeu M.V.M. Soares<sup>1</sup> & Ana I. Lillebø<sup>1\*</sup>

<sup>1</sup> Department of Biology & CESAM – Centre for Environmental and Marine Studies, University of Aveiro, Campus Universitário de Santiago, 3810-193 Aveiro, Portugal

<sup>2</sup> Department of Geosciences & GeoBioTec Research Centre, University of Aveiro, 3810-193 Aveiro, Campus Universitário de Santiago, 3810-193 Aveiro, Portugal

<sup>3</sup> Department of Environment and Planning & CESAM - Centre for Environmental and Marine Studies, University of Aveiro, Campus Universitário de Santiago, 3810-193 Aveiro, Portugal

\* Corresponding authors: [anaisousa@ua.pt](mailto:anaisousa@ua.pt) (A.I.Sousa); [lillebo@ua.pt](mailto:lillebo@ua.pt) (A.I.Lillebø)

Supplementary Table S1

| Plant species            |  | Site | Month | OM (%)         | pH             | Temperature (°C) | Particle size (mean, %) |                    |                    |                                            |
|--------------------------|--|------|-------|----------------|----------------|------------------|-------------------------|--------------------|--------------------|--------------------------------------------|
|                          |  |      |       |                |                |                  | <63 $\mu\text{m}$       | <125 $\mu\text{m}$ | <250 $\mu\text{m}$ | >250 $\mu\text{m}$<br>< 1000 $\mu\text{m}$ |
| <i>Juncus maritimus</i>  |  | 1    | Feb   | 18.7 $\pm$ 4.2 | 6.36 $\pm$ 0.1 | 13.3 $\pm$ 0.3   | 60.9                    | 16.1               | 22.9               | 0.1                                        |
|                          |  |      | Apr   | 19.9 $\pm$ 8.1 | 6.03 $\pm$ 0.1 | 13.3 $\pm$ 0.1   | 50.1                    | 27.3               | 22.3               | 0.4                                        |
|                          |  |      | Jun   | 17.3 $\pm$ 1.5 | 6.33 $\pm$ 0.5 | 22.0 $\pm$ 0.0   | 61.1                    | 18.1               | 20.6               | 0.2                                        |
|                          |  |      | Aug   | 15.2 $\pm$ 3.0 | 6.51 $\pm$ 0.0 | 21.9 $\pm$ 0.1   | 54.1                    | 28.1               | 17.8               | 0.0                                        |
|                          |  |      | Oct   | 14.7 $\pm$ 2.2 | 6.69 $\pm$ 0.2 | 16.1 $\pm$ 1.0   | 58.5                    | 14.2               | 27.1               | 0.2                                        |
|                          |  |      | Dec   | 16.0 $\pm$ 2.8 | 6.95 $\pm$ 0.2 | 7.5 $\pm$ 0.4    | 56.9                    | 20.8               | 22.1               | 0.0                                        |
|                          |  | 2    | Feb   | 28.2 $\pm$ 2.4 | 5.95 $\pm$ 0.5 | 11.9 $\pm$ 0.0   | 42.5                    | 27.0               | 29.3               | 1.2                                        |
|                          |  |      | Apr   | 21.5 $\pm$ 2.7 | 5.86 $\pm$ 0.0 | 12.4 $\pm$ 0.1   | 55.9                    | 22.1               | 21.9               | 0.2                                        |
|                          |  |      | Jun   | 22.4 $\pm$ 1.4 | 6.20 $\pm$ 0.3 | 18.4 $\pm$ 0.1   | 55.5                    | 19.5               | 23.8               | 1.2                                        |
|                          |  |      | Aug   | 21.7 $\pm$ 4.4 | 6.14 $\pm$ 0.2 | 20.1 $\pm$ 0.1   | 49.6                    | 23.9               | 25.7               | 0.8                                        |
|                          |  |      | Oct   | 17.8 $\pm$ 0.7 | 6.90 $\pm$ 0.1 | 14.4 $\pm$ 0.6   | 54.7                    | 19.5               | 25.5               | 0.3                                        |
|                          |  |      | Dec   | 20.4 $\pm$ 1.3 | 6.79 $\pm$ 0.3 | 8.7 $\pm$ 1.5    | 51.6                    | 22.4               | 25.2               | 0.0                                        |
|                          |  | 3    | Feb   | 19.3 $\pm$ 4.9 | 6.25 $\pm$ 0.2 | 13.1 $\pm$ 0.1   | 49.8                    | 23.8               | 25.9               | 0.4                                        |
|                          |  |      | Apr   | 21.2 $\pm$ 4.5 | 6.24 $\pm$ 0.1 | 12.3 $\pm$ 0.0   | 49.3                    | 28.2               | 21.7               | 0.8                                        |
|                          |  |      | Jun   | 21.0 $\pm$ 3.9 | 6.57 $\pm$ 0.2 | 25.4 $\pm$ 0.0   | 43.1                    | 26.2               | 30.1               | 0.6                                        |
|                          |  |      | Aug   | 11.9 $\pm$ 1.2 | 6.19 $\pm$ 0.2 | 21.2 $\pm$ 0.1   | 61.9                    | 16.4               | 21.5               | 0.2                                        |
|                          |  |      | Oct   | 15.8 $\pm$ 1.1 | 6.49 $\pm$ 0.2 | 11.7 $\pm$ 0.7   | 54.4                    | 16.2               | 29.1               | 0.3                                        |
|                          |  |      | Dec   | 17.5 $\pm$ 1.0 | 6.51 $\pm$ 0.3 | 7.2 $\pm$ 0.6    | 51.7                    | 22.2               | 25.7               | 0.0                                        |
| <i>Spartina maritima</i> |  | 2    | Feb   | 7.5 $\pm$ 0.6  | 6.79 $\pm$ 0.1 | 12.2 $\pm$ 0.0   | 37.8                    | 34.3               | 27.9               | 0.0                                        |
|                          |  |      | Apr   | 5.9 $\pm$ 1.0  | 7.18 $\pm$ 0.0 | 12.7 $\pm$ 0.2   | 27.2                    | 32.7               | 40.0               | 0.1                                        |
|                          |  |      | Jun   | 9.8 $\pm$ 4.9  | 7.07 $\pm$ 0.2 | 19.9 $\pm$ 0.1   | 47.4                    | 38.7               | 13.9               | 0.0                                        |
|                          |  |      | Aug   | 6.8 $\pm$ 2.0  | 7.08 $\pm$ 0.1 | 18.2 $\pm$ 0.0   | 31.0                    | 42.9               | 26.1               | 0.0                                        |
|                          |  |      | Oct   | 6.0 $\pm$ 3.4  | 6.90 $\pm$ 0.1 | 15.0 $\pm$ 0.1   | 27.1                    | 30.0               | 42.9               | 0.0                                        |
|                          |  |      | Dec   | 6.0 $\pm$ 1.6  | 6.89 $\pm$ 0.1 | 11.3 $\pm$ 0.4   | 35.6                    | 35.2               | 29.2               | 0.0                                        |
|                          |  | 3    | Feb   | 12.3 $\pm$ 1.6 | 6.56 $\pm$ 0.5 | 12.0 $\pm$ 0.1   | 53.6                    | 22.3               | 24.0               | 0.1                                        |
|                          |  |      | Apr   | 10.0 $\pm$ 1.1 | 6.08 $\pm$ 0.1 | 14.3 $\pm$ 0.0   | 64.7                    | 18.2               | 16.9               | 0.2                                        |
|                          |  |      | Jun   | 11.6 $\pm$ 3.1 | 6.35 $\pm$ 0.2 | 25.4 $\pm$ 0.0   | 54.6                    | 22.5               | 22.7               | 0.2                                        |
|                          |  |      | Aug   | 8.7 $\pm$ 0.3  | 6.51 $\pm$ 0.3 | 22.6 $\pm$ 0.1   | 62.9                    | 18.9               | 18.2               | 0.0                                        |
|                          |  |      | Oct   | 9.0 $\pm$ 1.0  | 6.13 $\pm$ 0.1 | 12.3 $\pm$ 0.8   | 62.5                    | 16.8               | 20.6               | 0.1                                        |
|                          |  |      | Dec   | 10.3 $\pm$ 1.4 | 6.62 $\pm$ 0.4 | 7.9 $\pm$ 0.7    | 61.2                    | 19.8               | 18.8               | 0.0                                        |

Supplementary Table S1 – Sediment characterization of *Juncus maritimus* and *Spartina maritima* sampled sites along one year (mean  $\pm$  SD, N=3). Organic matter (OM) is expressed as loss on ignition (LOI).

Supplementary Table S2

| Stock compartment |              | Low marsh                | Mid & high marsh        |                                               |                                            |                                               |
|-------------------|--------------|--------------------------|-------------------------|-----------------------------------------------|--------------------------------------------|-----------------------------------------------|
|                   |              | <i>Spartina maritima</i> | <i>Juncus maritimus</i> | <i>Halimione portulacoides</i> <sup>(a)</sup> | <i>Sarcocornia perennis</i> <sup>(a)</sup> | <i>Bolboschoenus maritimus</i> <sup>(a)</sup> |
| C                 | Plant        | 373.4±29.5               | 1384.1±24.8             | 843.0                                         | 863.1                                      | 1141.2                                        |
|                   | Sediment     | 119.5±5.3                | 132.7±5.8               | 157.3                                         | 152.0                                      | 182.9                                         |
|                   | <b>TOTAL</b> | <b>492.9±19.8</b>        | <b>1516.8±26.1</b>      | <b>1000.3</b>                                 | <b>1015.2</b>                              | <b>1324.0</b>                                 |
| N                 | Plant        | 13.4±1.1                 | 47.9±1.2                | 43.6                                          | 34.7                                       | 36.2                                          |
|                   | Sediment     | 9.9±1.3                  | 10.8±0.6                | 38.5                                          | 37.4                                       | 17.5                                          |
|                   | <b>TOTAL</b> | <b>23.3±0.1</b>          | <b>58.7±1.0</b>         | <b>109.0</b>                                  | <b>98.4</b>                                | <b>66.0</b>                                   |
| P                 | Plant        | 2.2±0.1                  | 8.6±0.1                 | 22.4                                          | 14.5                                       | 6.0                                           |
|                   | Sediment     | 2.8±0.2                  | 2.8±0.3                 | <b>6.9</b>                                    | <b>5.4</b>                                 | 4.5                                           |
|                   | <b>TOTAL</b> | <b>5.0±0.1</b>           | <b>11.5±0.3</b>         | <b>29.3</b>                                   | <b>19.9</b>                                | <b>10.5</b>                                   |

<sup>(a)</sup>Estimated from Sousa et al. (2010) data and considering the mean sedimentation rates estimated for Ria de Aveiro (see methods section).

Supplementary Table S2 – Blue C, N and P annual stocks (mean) at the Ria de Aveiro salt marshes, in the plant (above- and belowground material – annual mean (N=18) – g m<sup>-2</sup>), in the sediment (annual mean (N=18) – g m<sup>-2</sup> y<sup>-1</sup>), and the total (plant and sediment – g m<sup>-2</sup> y<sup>-1</sup>). Mean values (N=18) and standard error (SE) is also included for *S. maritima* and *J. maritimus* marshes.

Supplementary Figure S1

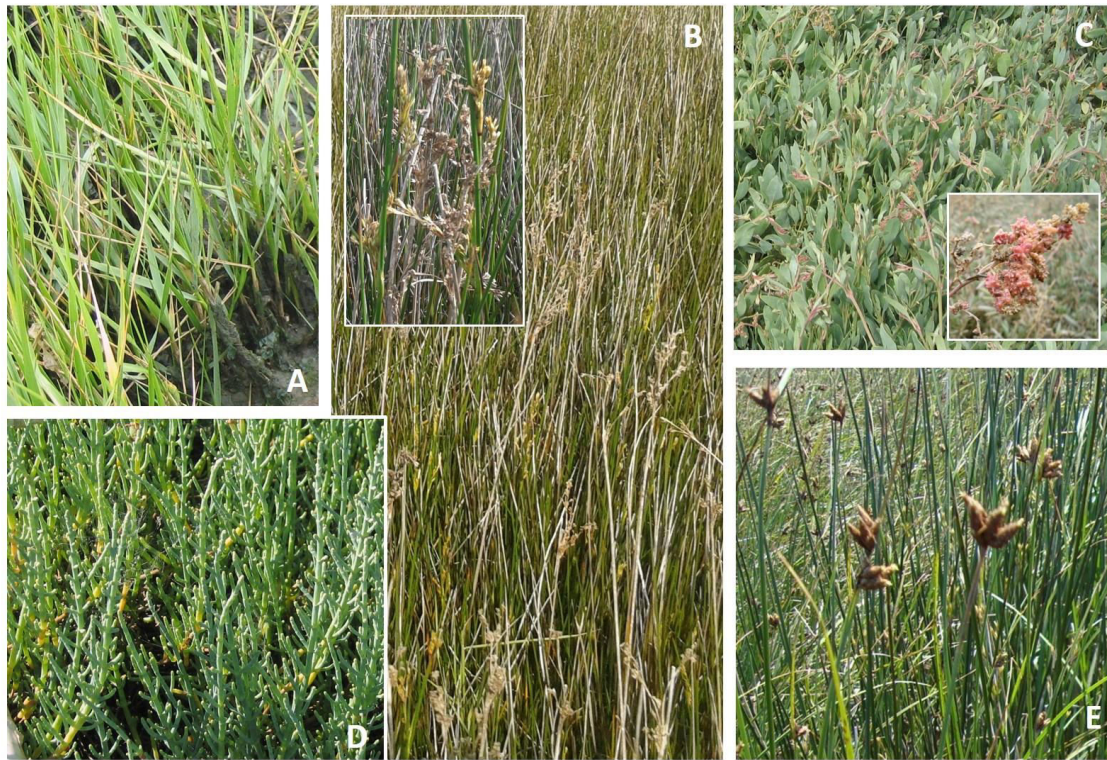

Supplementary Figure S1 – Salt marsh plants: *Spartina maritima* (A), *Juncus maritimus* with flowering in detail (B), *Halimione portulacoides* with flowering in detail (C), *Sarcocornia perennis* (D), *Bolboeschenus maritimus* (E). Pictures copyright: ©A.I. Sousa and ©A.I. Lillebø.

Supplementary Figure S2

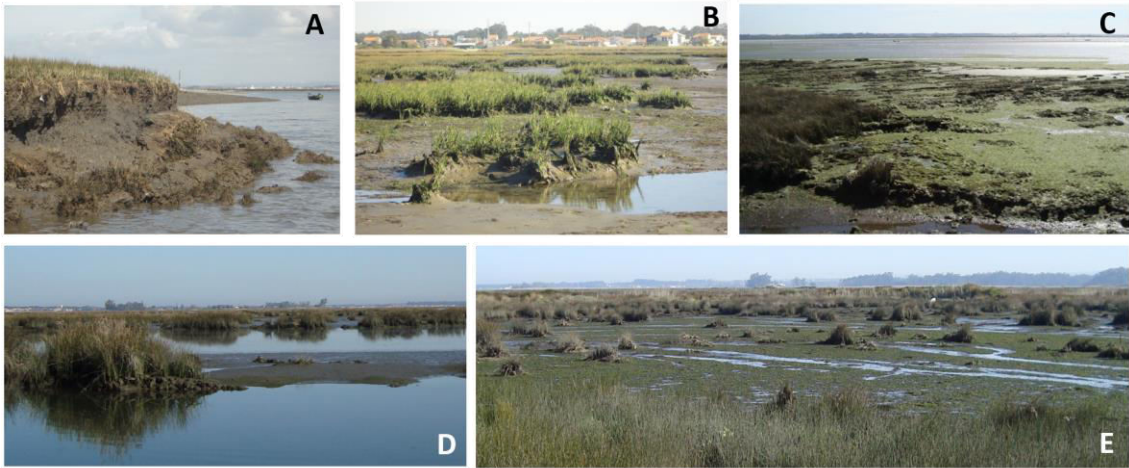

Supplementary Figure S2 – Salt marshes showing evidence of erosion of the shorelines in the Ria de Aveiro. *Spartina maritima* marsh (A, B), eroded shoreline in the marsh (C), and *Juncus maritimus* marsh (D, E). Pictures copyright: ©A.I. Sousa and ©A.I. Lillebø.

Supplementary Figure S3

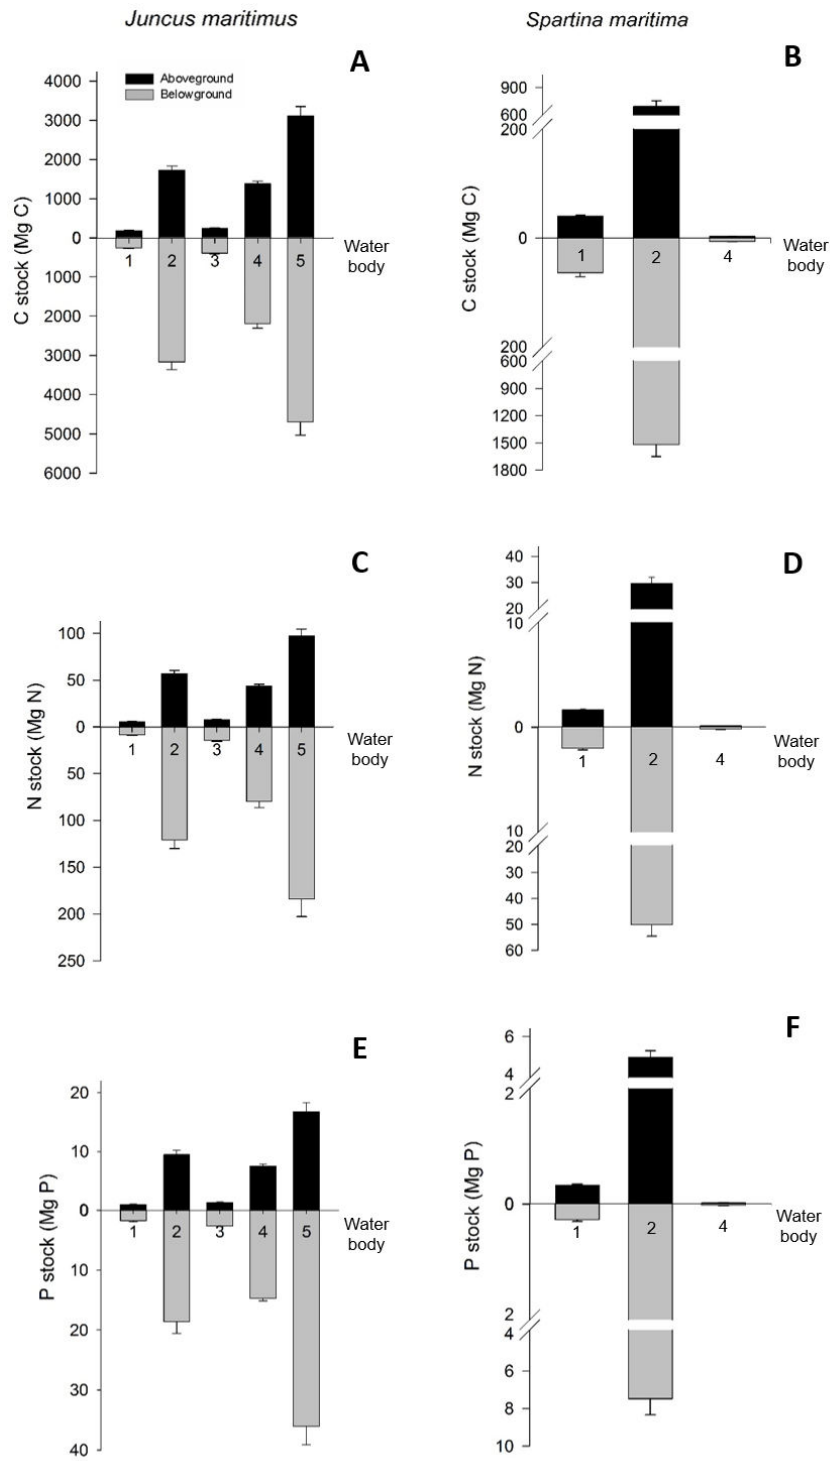

Supplementary Figure S3 – Total C, N and P stocks (mean  $\pm$  SE, N=18) at the aboveground biomass (leaves and stems) and belowground biomass (roots and rhizomes) in *Juncus maritimus* (A, C, E) and *Spartina maritima* (B, D, F) marshes at Ria de Aveiro, per water body (WB).
